# Supplementary material
Source: PubMed Central journal article supplement (PMC6895446)
Supplement: ajcr0009-2469-f6.pdf [file ajcr0009-2469-f6.pdf]

# Riboflavin deficiency and esophageal tumorigenesis

**Supplementary Table 1.** Primer sequences for qRT-PCR

| Primer Name      | Sequence (5' to 3')    |
|------------------|------------------------|
| <i>Tp63-qF</i>   | TGTGTCGGAGGAATGAACCG   |
| <i>Tp63-qR</i>   | CTTCGTACCATCGCCGTTCT   |
| <i>Rab10-qF</i>  | ACAAGTGTGACATGGACGACA  |
| <i>Rab10-qR</i>  | TACAGGGGTCTTTCGGAGGAT  |
| <i>Grhl2-qF</i>  | GATGATGAGCGAGAAGGCAGCA |
| <i>Grhl2-qR</i>  | GCGATTTCAGCATCAGAGCATC |
| <i>Aloxe3-qF</i> | GGTGAACACCACCTGTAGCA   |
| <i>Aloxe3-qR</i> | CGTGCCCTGATGCCTTTGA    |
| <i>S100a8-qF</i> | GGAATCACCATGCCCTCTACA  |
| <i>S100a8-qR</i> | CTGTCTTTATGAGCTGCCACG  |
| <i>S100a9-qF</i> | ACACCCTGAACAAGCGGAA    |
| <i>S100a9-qR</i> | CTGGTTTGTGTCCAGGTCCTC  |
| <i>Tlr2-qF</i>   | TCTTAGGCGCCCTGTGTAC    |
| <i>Tlr2-qR</i>   | TCCTGCTCGCTGTAGGAAAC   |
| <i>Jun-qF</i>    | GAAAGCGCAAACCTCCGAGC   |
| <i>Jun-qR</i>    | TGCGTTAGCATGAGTTGGCA   |
| <i>Il1a-qF</i>   | ACTCAGCTCTTTGTGAGTGCT  |
| <i>Il1a-qR</i>   | TGAGGTCGGTCTCACTACCT   |

A

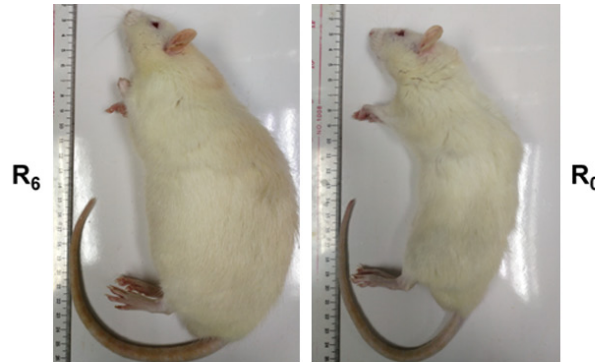

B

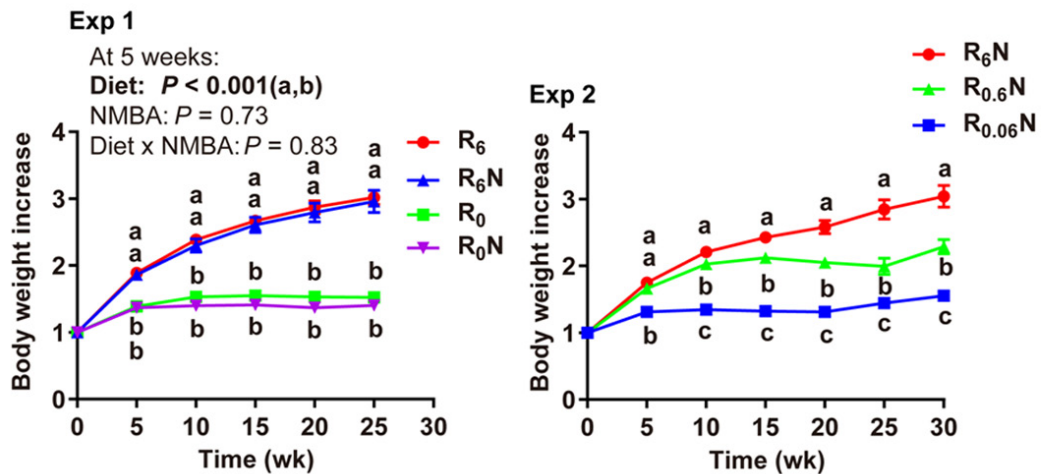

# Riboflavin deficiency and esophageal tumorigenesis

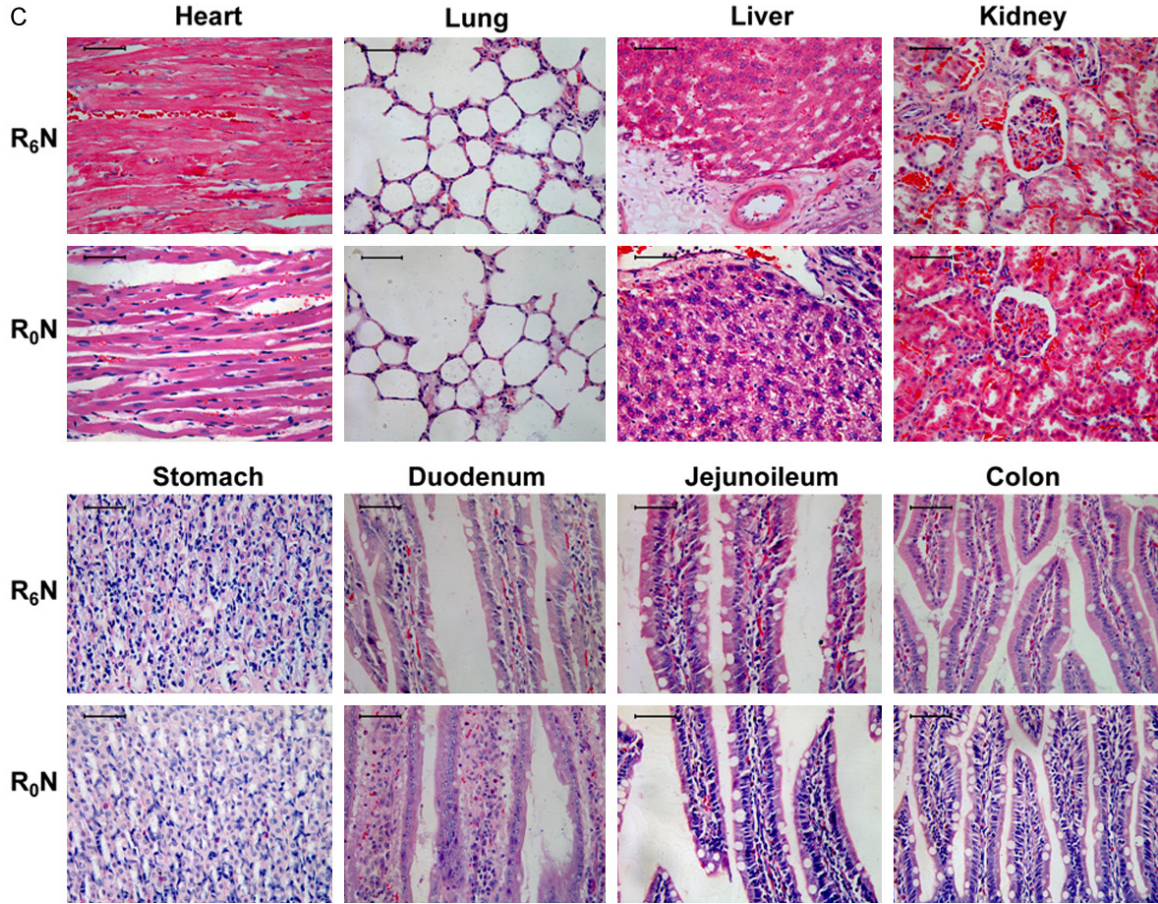

**Supplementary Figure 1.** Effect of RBF deficiency combined with NMBA on body weight and histopathological changes of organs in rats. A. Representative pictures of rat body weight. B. Rat body weight increase. Exp 1,  $n = 15-18/\text{group}$ ; Exp 2,  $n = 12-19/\text{group}$ . Values are means  $\pm$  SD. Exp 1 different letters (a and b for diet effect) are significantly different by two-way ANOVA and LSD test ( $P < 0.05$ ). Exp 2 different letters (a, b and c) are significantly different from each other by one-way ANOVA and LSD test ( $P < 0.05$ ). C. HE staining of rat heart, lung, liver, kidney, stomach, duodenum, jejunioileum, and colon. Scale bars, 50  $\mu\text{m}$ .

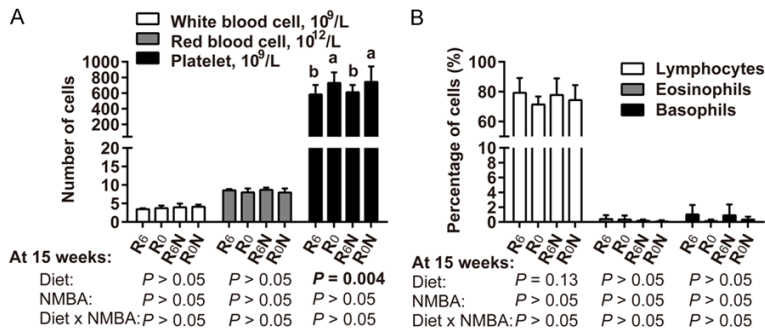

**Supplementary Figure 2.** Effect of RBF deficiency combined with NMBA on the total number and percentage of white blood cells. A. Number of various cells in peripheral blood. B. The percentage of lymphocytes, eosinophils, and basophils in the total white blood cells, respectively.  $n = 15-18/\text{group}$ . Values are means  $\pm$  SD. Different letters (a and b for diet effect) are significantly different by two-way ANOVA and LSD test ( $P < 0.05$ ).
